# Supplementary material for: Cost-Effectiveness of a New Internet-Based Monitoring Tool for Neonatal Post-Discharge Home Care
Source: J Med Internet Res. 2013 Feb 18;15(2):e38. doi: 10.2196/jmir.2361 (PMC3636285; doi:10.2196/jmir.2361)
Supplement: Supplementary file 2 [file jmir_v15i2e38_app2.pdf]

**Multimedia Appendix 2:** Translation for “Tips for baby care” page in the free access area of “Babies at home” website.

Translation from original version in Catalan and Spanish: *Header:* “Babies at home”. *Menu-bar:* “Home”, “Tips for baby care”, “Useful links”, “Online baby follow-up”, “About us”. *Content:* “Tips for baby care”. “Breastfeeding: Why breastfeeding?; When breastfeeding?; How should you do it?; Most frequent problems; Lactation of premature babies; Lactation of twins; Milk extraction and conservation; Toxic substances which pass to breast milk; References; Support groups, videos and interesting websites”. “Artificial lactation: Feeding bottle preparation”. “Sensory stimulation: Recommended activities in the first month of life”.

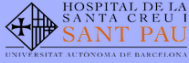**HOSPITAL DE LA  
SANTA CREU I  
SANT PAU**  
UNIVERSITAT AUTÒNOMA DE BARCELONA

# Petits a casa

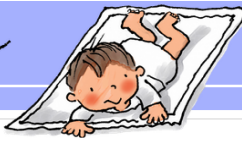

[Inici](#) [Consells per cuidar el nadó](#) [Enllaços útils](#) [Seguiment on line del nadó](#) [Qui som](#)

## Consells per cuidar el nadó

### Lactància amb llet materna

Per què donar el pit?  
Quan donar el pit?  
Com s'ha de fer? [Vídeo 1](#)  
Problemes més freqüents  
Lactància en nadons prematurs [Vídeo 2](#)  
Lactància en bessons i tàndem  
Extracció i conservació de la llet materna  
Substàncies tòxiques que passen a la llet materna  
Bibliografia  
Grups d'ajuda, vídeos i webs d'interès

### Lactancia con leche materna

[¿Por qué dar el pecho?](#)  
[¿Cuándo dar el pecho?](#)  
[¿Cómo hay que hacerlo? Vídeo 1](#)  
[Problemas más frecuentes](#)  
[Lactancia en niños prematuros Vídeo 2](#)  
[Lactancia en gemelos y tandem](#)  
[Extracción y conservación de la leche materna](#)  
[Sustancias tóxicas que pasan a la leche materna](#)  
[Bibliografía](#)  
[Grupos de apoyo, vídeo y webs de interés](#)

### Lactància amb llet artificial

[Preparació de formules i biberó](#)

### Lactancia con leche artificial

[Preparación de formulas y biberón](#)

### Estimulació sensorial

[Activitats recomanades pel primer mes de vida](#)

### Estimulación sensorial

[Actividades recomendadas para los primeros meses de vida](#)
