# Supplementary material for: Cost-Effectiveness of a New Internet-Based Monitoring Tool for Neonatal Post-Discharge Home Care
Source: J Med Internet Res. 2013 Feb 18;15(2):e38. doi: 10.2196/jmir.2361 (PMC3636285; doi:10.2196/jmir.2361)
Supplement: Supplementary file 3 [file jmir_v15i2e38_app3.pdf]

**Multimedia Appendix 3:** Translation for "Parents' area" access page screenshot.

Translation from original version in Catalan: *Header:* "Babies at home". *Menu-bar:* "Home", "Tips for baby care", "Useful links", "Online baby follow-up", "About us". *Content:* "Online baby follow-up. Access to this section is exclusively for parents registered to the online baby follow-up service.", "Login. Your e-mail address. Your password. Enter.", "Forgot your password?", "Healthcare professionals".

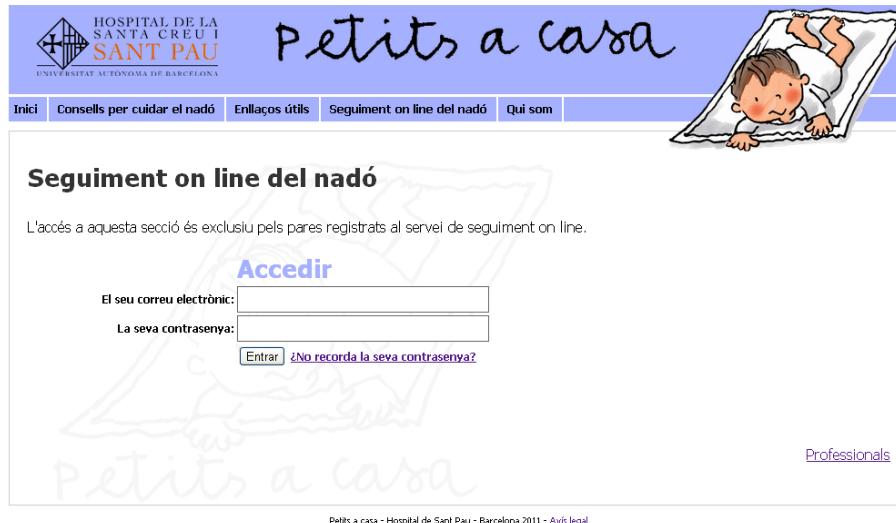

The screenshot shows the login page for 'Petits a casa', a service from Hospital de la Santa Creu i Sant Pau. The header features the hospital's logo and name, the title 'Petits a casa' in a handwritten font, and a cartoon illustration of a baby peeking over a blanket. A navigation bar includes links for 'Inici', 'Consells per cuidar el nadó', 'Enllaços útils', 'Seguiment on line del nadó', and 'Qui som'. The main section is titled 'Seguiment on line del nadó' and states that access is exclusive to registered parents. It features a blue 'Accedir' button and two input fields for 'El seu correu electrònic:' and 'La seva contrasenya:'. Below the password field is an 'Entrar' button and a link for '¿No recorda la seva contrasenya?'. A 'Professionals' link is located in the bottom right corner. The footer contains the text 'Petits a casa - Hospital de Sant Pau - Barcelona 2011 - [Avís legal](#)'.

HOSPITAL DE LA SANTA CREU I SANT PAU  
UNIVERSITAT AUTÒNOMA DE BARCELONA

*Petits a casa*

[Inici](#) [Consells per cuidar el nadó](#) [Enllaços útils](#) [Seguiment on line del nadó](#) [Qui som](#)

**Seguiment on line del nadó**

L'accés a aquesta secció és exclusiu pels pares registrats al servei de seguiment on line.

**Accedir**

El seu correu electrònic:

La seva contrasenya:

[¿No recorda la seva contrasenya?](#)

[Professionals](#)

*Petits a casa*

Petits a casa - Hospital de Sant Pau - Barcelona 2011 - [Avís legal](#)
