# Supplementary material for: Cost-Effectiveness of a New Internet-Based Monitoring Tool for Neonatal Post-Discharge Home Care
Source: J Med Internet Res. 2013 Feb 18;15(2):e38. doi: 10.2196/jmir.2361 (PMC3636285; doi:10.2196/jmir.2361)
Supplement: Supplementary file 5 [file jmir_v15i2e38_app5.pdf]

## Multimedia Appendix 5: Translation of Final online satisfaction survey.

Translation from original version in Catalan: *Header*: “Babies at home. Online baby follow-up”. “Satisfaction survey. Please, choose an answer between 0 and 5 for each of the following questions (consider that 0 means “I strongly disagree” and 5 means “I strongly agree”)”.

1. “In general the Web service ‘Babies at home’ was helpful.”
2. “The available information helped me take care of the baby.”
3. “The information available on the website could clarify my doubts.”
4. “The e-mail service with nurses available on the website was useful.”
5. “The files and recommended links were useful.”
6. “The nurse’s answers to my questions were useful.”
7. “The use of the website avoided visits to the primary care center.”
8. “The use of the website avoided visits to the emergency department.”
9. “I would recommend this website.”
10. “Suggestions”

“Submit”

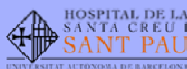

**HOSPITAL DE LA  
SANTA CREU I  
SANT PAU**  
UNIVERSITAT AUTÒNOMA DE BARCELONA

# Petits a casa

Seguiment telemàtic individualitzat del nadó

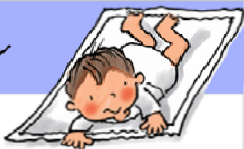

## Qüestionari de satisfacció

Questionario de satisfacción

Puntuau de 0 a 5 les següents preguntes (tenint en compte que 0 és el grau més baix de satisfacció i que 5 és el grau més alt).

Puntúe de 0 a 5 las siguientes preguntas (teniendo en cuenta que 0 es el grado más bajo de satisfacción y que 5 es el grado más alto).

|     |                                                                                                 |                                                                                                                                                 |
|-----|-------------------------------------------------------------------------------------------------|-------------------------------------------------------------------------------------------------------------------------------------------------|
| 1.  | La valoració general del servei PAD via Web "PETITS A CASA" ha estat útil en un grau de:        | <input type="radio"/> 0 <input type="radio"/> 1 <input type="radio"/> 2 <input type="radio"/> 3 <input type="radio"/> 4 <input type="radio"/> 5 |
| 2.  | La informació exposada us ha servit per tenir cura del bebè en un grau de:                      | <input type="radio"/> 0 <input type="radio"/> 1 <input type="radio"/> 2 <input type="radio"/> 3 <input type="radio"/> 4 <input type="radio"/> 5 |
| 3.  | La informació exposada a través del lloc web us ha servit per aclarir els dubtes en un grau de: | <input type="radio"/> 0 <input type="radio"/> 1 <input type="radio"/> 2 <input type="radio"/> 3 <input type="radio"/> 4 <input type="radio"/> 5 |
| 4.  | El servei de consultes obertes on-line ha estat satisfactori en un grau de:                     | <input type="radio"/> 0 <input type="radio"/> 1 <input type="radio"/> 2 <input type="radio"/> 3 <input type="radio"/> 4 <input type="radio"/> 5 |
| 5.  | Els arxius i enllaços recomanats han resultat útils en un grau de:                              | <input type="radio"/> 0 <input type="radio"/> 1 <input type="radio"/> 2 <input type="radio"/> 3 <input type="radio"/> 4 <input type="radio"/> 5 |
| 6.  | Les respostes de la infermera les valoreu en un grau de:                                        | <input type="radio"/> 0 <input type="radio"/> 1 <input type="radio"/> 2 <input type="radio"/> 3 <input type="radio"/> 4 <input type="radio"/> 5 |
| 7.  | L'ús d'aquesta web ha evitat consultes als professionals del CAP:                               | <input type="radio"/> si <input type="radio"/> no                                                                                               |
| 8.  | L'ús d'aquesta web ha evitat visites a un centre d'urgències:                                   | <input type="radio"/> si <input type="radio"/> no                                                                                               |
| 9.  | Recomanarieu aquesta web?                                                                       | <input type="radio"/> si <input type="radio"/> no                                                                                               |
| 10. | Suggeriments                                                                                    |                                                                                                                                                 |

Enviar
